# Supplementary material for: Complete loss of KCNA1 activity causes neonatal epileptic encephalopathy and dyskinesia
Source: PubMed Central journal article supplement — J Med Genet. 2019 Oct 5;57(2):132–7. doi: 10.1136/jmedgenet-2019-106373 (PMC7029237; doi:10.1136/jmedgenet-2019-106373), 2019-10-05
Supplement: jmedgenet-2019-106373supp001.pdf [file jmedgenet-2019-106373supp001.pdf]

**Supplemental Table 1:** Electrophysiological characteristics of wild-type and heterozygous Kv1.1 channels. The voltage-dependent parameters of activation ( $V_{1/2}$  and  $k$ ) were obtained from the Boltzmann equation as described in Methods. Data are presented as mean  $\pm$  SEM, with the number of investigated cells in parentheses. WT: wild-type Kv1.1 channel; WT/p.Val368Leu cotransfection of wild-type and mutant channel (p.Val368Leu).  $V_{1/2}$  is the voltage of half-maximal activation.  $k$  is the slope factor.

|                | <b>WT</b><br>(n=11) | <b>WT/ p.Val368Leu</b><br>(n=15) |
|----------------|---------------------|----------------------------------|
| $V_{1/2}$ (mV) | $-26.7 \pm 1.2$     | $-26.1 \pm 1.6$                  |
| $k$ (mV)       | $7.4 \pm 0.6$       | $6.6 \pm 0.5$                    |
